# Supplementary figures and images for: Functional Profiling of In Vitro Reactivated Memory B Cells Following Natural SARS-CoV-2 Infection and Gam-COVID-Vac Vaccination
Source: MDPI journal article supplement (doi:10.3390/cells11131991), 2022-06-21

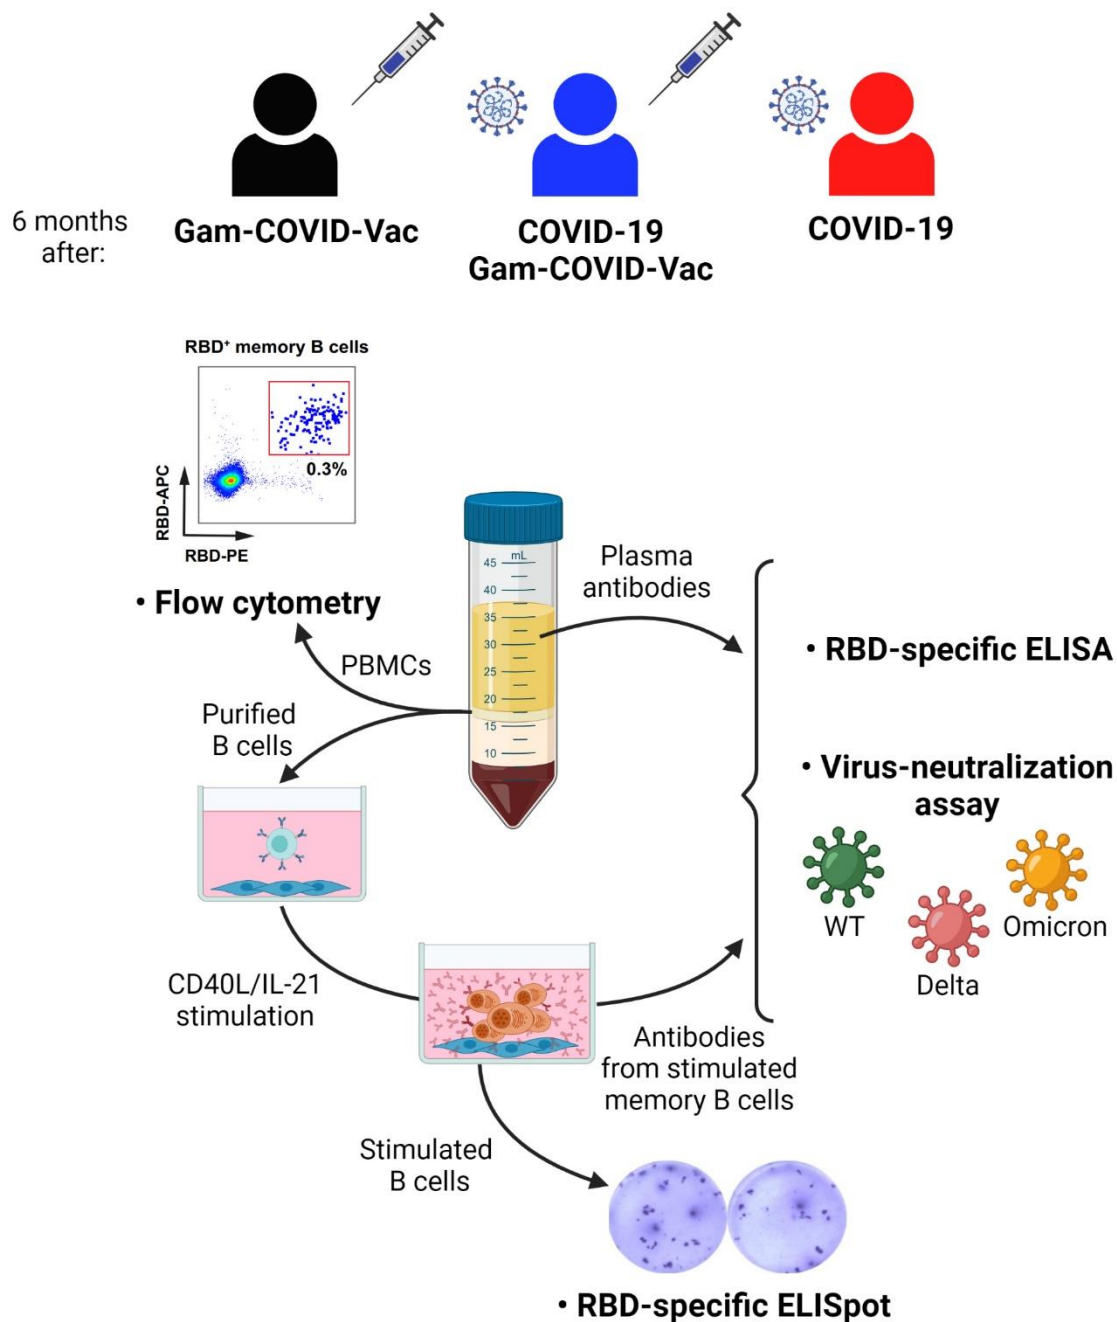

Figure S1. Study design.

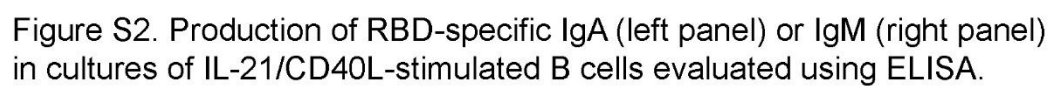

Supplement: s1 [file s1]
